# Supplementary material for: Is Greener Better? Quantifying the Impact of a Nature Walk on Stress Reduction using HRV and Saliva Cortisol Biomarkers
Source: Preprints.org preprint supplement (doi:10.20944/preprints202409.2447.v1), 2024-10-01
Supplement: Supplementary file 1 [file supplementary]

# Supplemental Information

**Supplemental Figure 1** – Group 1 participants who showed increases in both RMSSD and SDNN for green road (green) vs urban road (blue). Highlighted regions indicate the timeframe of the walk. Smoothed line was fitted using a spline curve.

| 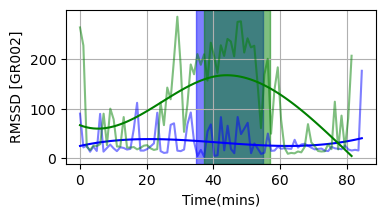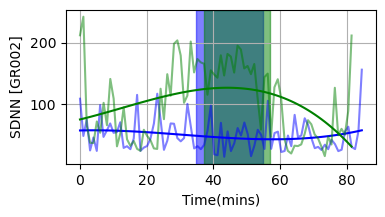GR002 | 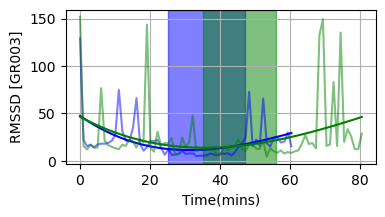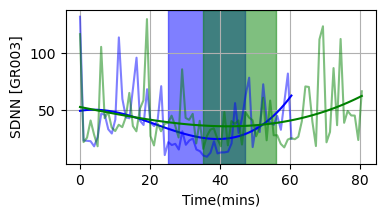 GR003 | 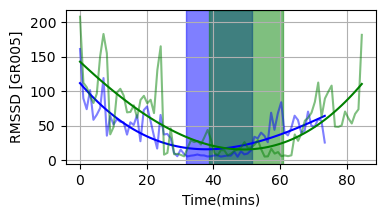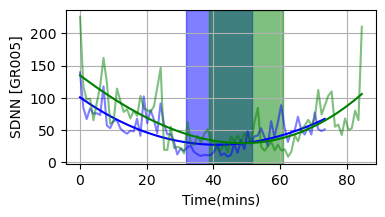 GR005 |
| --- | --- | --- |
| 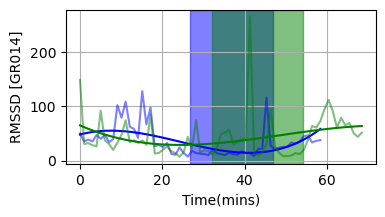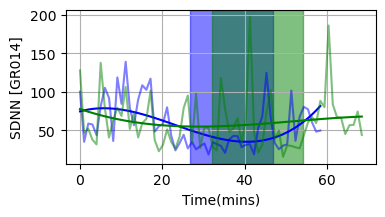 GR014 | 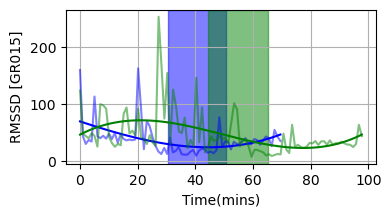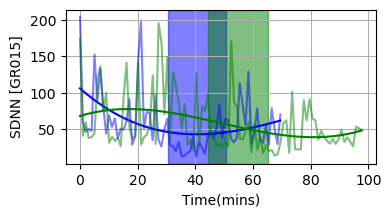 GR015 | 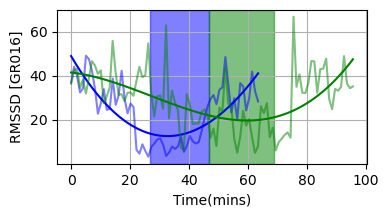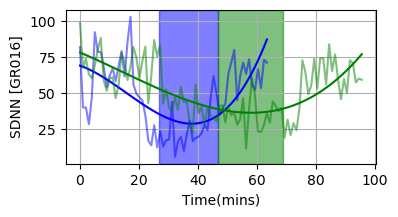 GR016 |
| 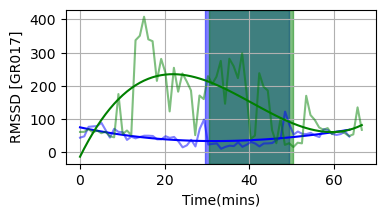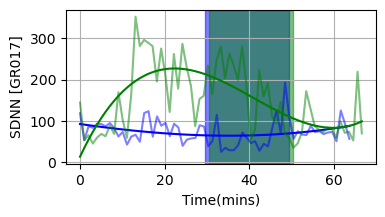 GR017 | 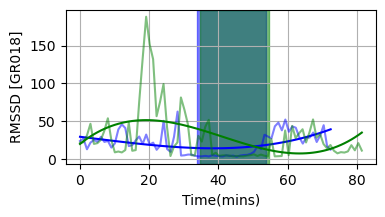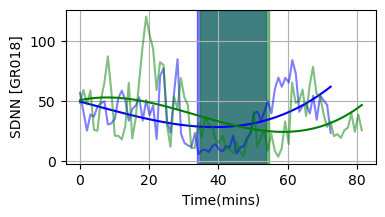 GR018 | 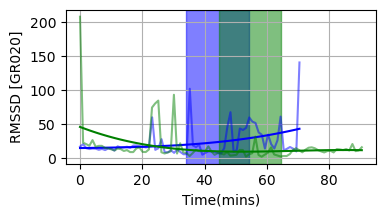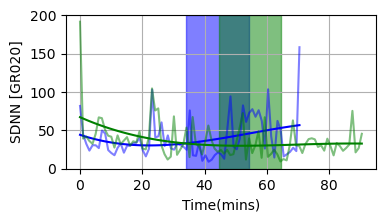 GR020 |
